# Supplementary material
Source: Springer Nature journal article supplement (https://www.springermedizin.de/resource/supplementary/12887_2011_485_MOESM2_ESM.pdf/9475242)

Prescribed NVP dose/m<sup>2</sup> by Weight in kg

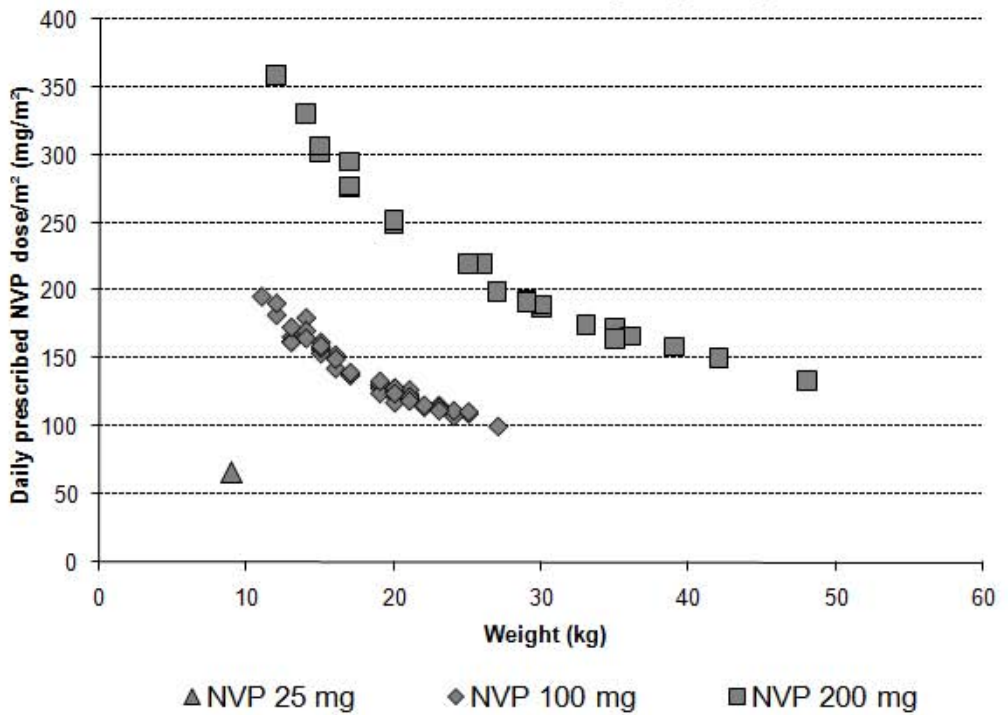

NVP plasma concentration by weight in kg

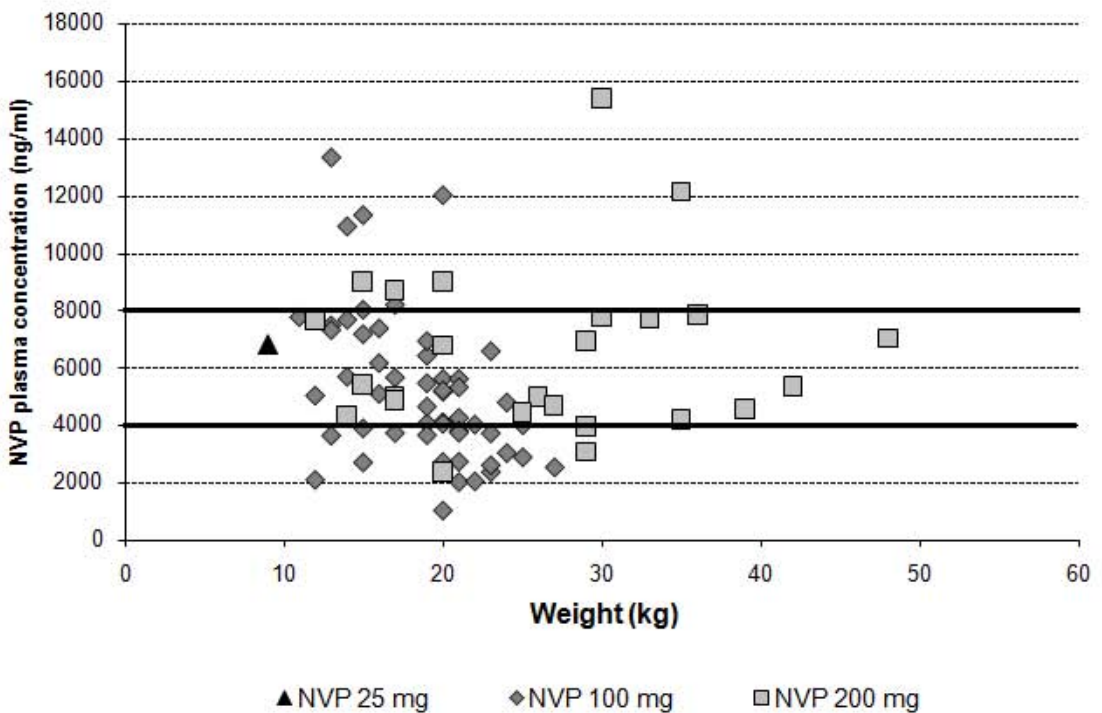

Supplement: MOESM2 [file 9475242]
